# Supplementary material for: Color Representation Is Retinotopically Biased but Locally Intermingled in Mouse V1
Source: PubMed Central journal article supplement (PMC5370321; doi:10.3389/fncir.2017.00022), 2017-03-29
Supplement: Image_1.pdf [file Image_1.pdf]

## Supplementary Material

### Color representation is retinotopically biased but locally intermingled in mouse V1

Shuhei Aihara<sup>1, †</sup>, Takashi Yoshida<sup>1, 2</sup>, Takayuki Hashimoto<sup>1</sup> and Kenichi Ohki<sup>1, 2, 3, \*</sup>

<sup>1</sup>Department of Molecular Physiology, Graduate School of Medical Sciences, Kyushu University, Fukuoka, Japan

<sup>2</sup>Department of Physiology, The University of Tokyo School of Medicine, Tokyo, Japan.

<sup>3</sup>CREST, Japan Science and Technology Agency, Tokyo, Japan

**\*Correspondence:** Kenichi Ohki: kohki@m.u-tokyo.ac.jp, Takashi Yoshida: takashiy@m.u-tokyo.ac.jp

<sup>†</sup>Present address: Laboratory for Sensory Circuit Formation, RIKEN, Center for Developmental Biology, Kobe, Japan

#### 1 Supplementary Figures

Here we show one supplementary figure related to Figure 2 and 3.

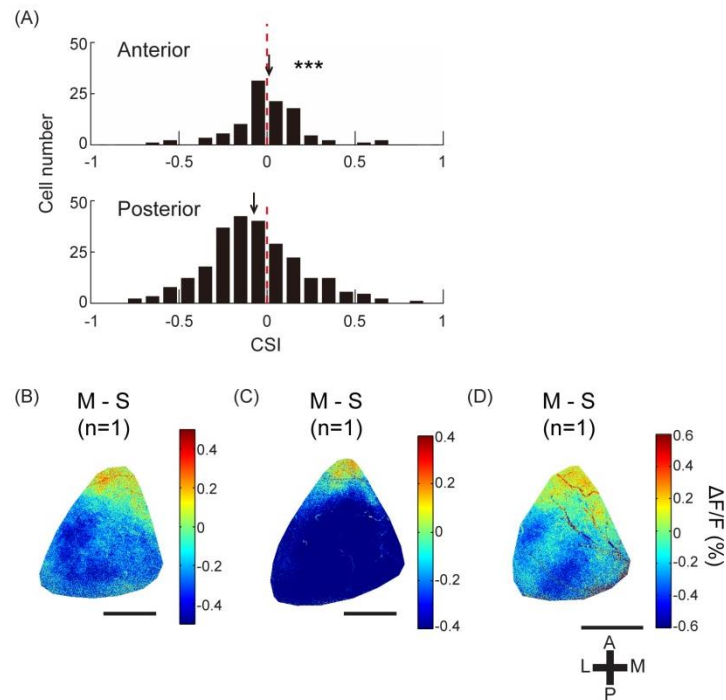

**Supplementary Figure 1.** Results of individual mice: CSI histograms and wide-field subtraction maps. (A) CSI histograms from two mice in which recording were performed from both anterior and posterior V1 in the same mouse. These two histograms showed a similar tendency to that of population data. \*\*\*:  $P < 0.001$  by Kolmogorov Smirnov test. (B-D) Three examples of subtraction map from single mice. Anterior V1 showed positive value (M-opsin response dominant), whereas posterior V1 showed negative value (S-opsin response dominant), indicating that graded color representation was consistent across mice.
